# Supplementary material for: Efficacy and Safety of Polyunsaturated Fatty Acids Supplementation in the Treatment of Attention Deficit Hyperactivity Disorder (ADHD) in Children and Adolescents: A Systematic Review and Meta-Analysis of Clinical Trials
Source: MDPI journal article supplement (doi:10.3390/nu13041226), 2021-04-08
Supplement: s1 [file s1]

## Characteristics of studies

### Characteristics of excluded studies

#### *Abdullah 2019*

|                      |                    |
|----------------------|--------------------|
| Reason for exclusion | Wrong study design |
|----------------------|--------------------|

#### *Anand 2016*

|                      |                    |
|----------------------|--------------------|
| Reason for exclusion | Wrong study design |
|----------------------|--------------------|

#### *Anjos 2013*

|                      |                          |
|----------------------|--------------------------|
| Reason for exclusion | Wrong patient population |
|----------------------|--------------------------|

#### *Arnold 2013*

|                      |                    |
|----------------------|--------------------|
| Reason for exclusion | Wrong study design |
|----------------------|--------------------|

#### *Assareh 2017*

|                      |        |
|----------------------|--------|
| Reason for exclusion | Dublet |
|----------------------|--------|

#### *Behdani 2013*

|                      |        |
|----------------------|--------|
| Reason for exclusion | Dublet |
|----------------------|--------|

#### *Carucci 2017*

|                      |                    |
|----------------------|--------------------|
| Reason for exclusion | Wrong study design |
|----------------------|--------------------|

#### *Carucci 2019*

|                      |                    |
|----------------------|--------------------|
| Reason for exclusion | Wrong study design |
|----------------------|--------------------|

#### *Catala Lopez 2017*

|                      |                    |
|----------------------|--------------------|
| Reason for exclusion | Wrong study design |
|----------------------|--------------------|

#### *Chang 2017*

|                      |                    |
|----------------------|--------------------|
| Reason for exclusion | Wrong study design |
|----------------------|--------------------|

#### *Chang 2018*

|                      |                    |
|----------------------|--------------------|
| Reason for exclusion | Wrong study design |
|----------------------|--------------------|

#### *Chang 2019a*

|                      |                    |
|----------------------|--------------------|
| Reason for exclusion | Wrong study design |
|----------------------|--------------------|

#### *Cooper 2015*

|                      |                          |
|----------------------|--------------------------|
| Reason for exclusion | Wrong patient population |
|----------------------|--------------------------|

#### *Cooper 2016*

|                      |                          |
|----------------------|--------------------------|
| Reason for exclusion | Wrong patient population |
|----------------------|--------------------------|

#### *Dean 2014*

|                      |                          |
|----------------------|--------------------------|
| Reason for exclusion | Wrong patient population |
|----------------------|--------------------------|

#### *Derbyshire 2017*

|                      |                    |
|----------------------|--------------------|
| Reason for exclusion | Wrong study design |
|----------------------|--------------------|

#### *Derbyshire 2017a*

|                      |                    |
|----------------------|--------------------|
| Reason for exclusion | Wrong study design |
|----------------------|--------------------|

**Fallah 2018**

|                      |                          |
|----------------------|--------------------------|
| Reason for exclusion | Wrong patient population |
|----------------------|--------------------------|

**Fibert 2018**

|                      |                    |
|----------------------|--------------------|
| Reason for exclusion | Wrong study design |
|----------------------|--------------------|

**Foley 2013**

|                      |                    |
|----------------------|--------------------|
| Reason for exclusion | Wrong study design |
|----------------------|--------------------|

**Ghanizadeh 2015**

|                      |                    |
|----------------------|--------------------|
| Reason for exclusion | Wrong intervention |
|----------------------|--------------------|

**Goode 2018**

|                      |                    |
|----------------------|--------------------|
| Reason for exclusion | Wrong study design |
|----------------------|--------------------|

**Gow 2014**

|                      |                    |
|----------------------|--------------------|
| Reason for exclusion | Wrong study design |
|----------------------|--------------------|

**Gow 2015**

|                      |                    |
|----------------------|--------------------|
| Reason for exclusion | Wrong study design |
|----------------------|--------------------|

**Hawkey 2014**

|                      |                    |
|----------------------|--------------------|
| Reason for exclusion | Wrong study design |
|----------------------|--------------------|

**Johnson 2017**

|                      |                          |
|----------------------|--------------------------|
| Reason for exclusion | Wrong patient population |
|----------------------|--------------------------|

**Kean 2017a**

|                      |                          |
|----------------------|--------------------------|
| Reason for exclusion | Wrong patient population |
|----------------------|--------------------------|

**Kotting 2013**

|                      |                    |
|----------------------|--------------------|
| Reason for exclusion | Wrong intervention |
|----------------------|--------------------|

**Lange 2015**

|                      |                    |
|----------------------|--------------------|
| Reason for exclusion | Wrong study design |
|----------------------|--------------------|

**LimAshworth 2013**

|                      |                    |
|----------------------|--------------------|
| Reason for exclusion | Wrong study design |
|----------------------|--------------------|

**Liu 2015**

|                      |                  |
|----------------------|------------------|
| Reason for exclusion | Wrong indication |
|----------------------|------------------|

**McNamara 2017**

|                      |                    |
|----------------------|--------------------|
| Reason for exclusion | Wrong study design |
|----------------------|--------------------|

**Moghaddam 2017**

|                      |                |
|----------------------|----------------|
| Reason for exclusion | Wrong outcomes |
|----------------------|----------------|

**NLimAshworth 2013**

|                      |                    |
|----------------------|--------------------|
| Reason for exclusion | Wrong study design |
|----------------------|--------------------|

**Pelsser 2017**

|                      |                    |
|----------------------|--------------------|
| Reason for exclusion | Wrong study design |
|----------------------|--------------------|

**Pelsser 2017a**

|                      |                    |
|----------------------|--------------------|
| Reason for exclusion | Wrong study design |
|----------------------|--------------------|

**Puri 2014**

|                      |                    |
|----------------------|--------------------|
| Reason for exclusion | Wrong study design |
|----------------------|--------------------|

**Ramakrishnan 2016**

|                      |                          |
|----------------------|--------------------------|
| Reason for exclusion | Wrong patient population |
|----------------------|--------------------------|

**Reading 2013**

|                      |                    |
|----------------------|--------------------|
| Reason for exclusion | Wrong study design |
|----------------------|--------------------|

**Rosi 2020**

|                      |                    |
|----------------------|--------------------|
| Reason for exclusion | Wrong study design |
|----------------------|--------------------|

**Sanna 2019**

|                      |                    |
|----------------------|--------------------|
| Reason for exclusion | Wrong study design |
|----------------------|--------------------|

**Smuts 2013**

|                      |                    |
|----------------------|--------------------|
| Reason for exclusion | Wrong study design |
|----------------------|--------------------|

**Stevenson 2014**

|                      |        |
|----------------------|--------|
| Reason for exclusion | Dublet |
|----------------------|--------|

**Tan 2014**

|                      |                    |
|----------------------|--------------------|
| Reason for exclusion | Wrong study design |
|----------------------|--------------------|

**vanderWurff 2017**

|                      |                    |
|----------------------|--------------------|
| Reason for exclusion | Wrong study design |
|----------------------|--------------------|

**Wilens 2017**

|                      |                    |
|----------------------|--------------------|
| Reason for exclusion | Wrong study design |
|----------------------|--------------------|

**Wu 2015**

|                      |                |
|----------------------|----------------|
| Reason for exclusion | Wrong outcomes |
|----------------------|----------------|

*Footnotes*
